# Supplementary material for: A flexible and monolithic nanocomposite aerogel of carbon nanofibers and crystalline titania: fabrication and applications
Source: Royal Society of Chemistry journal article supplement (doi:10.1039/c3ra44820g), 2013-01-01
Supplement: c3ra44820g.pdf [file c3ra44820g.pdf]

# **A Flexible and Monolithic Nanocomposite Aerogel of Carbon Nanofibers and Crystalline Titania: Fabrication and Applications**

Yu Wang, Yongcun Zou, Jian Chen, Guo-Dong Li, Yan Xu\*

*State Key Lab of Inorganic Synthesis and Preparative Chemistry, Jilin University,  
2699 Qianjin Street, Changchun 130012, P.R. China,*

**Supplementary Information**

## Contents:

Fig. S1 (a) TEM image of the titania nanoparticles, (b) EDX pattern of the titania nanoparticles.

Fig. S2 SEM image of the anatase TiO<sub>2</sub> aerogel.

Fig. S3 CV curves of CNF@TiO<sub>2</sub> nanocomposite at a scan rate of 0.2 mV s<sup>-1</sup> over a potential range of 1.0-2.7 V.

Fig. S4 Impedance plot of the CNF@TiO<sub>2</sub> nanocomposite.

Fig. S5 Cycling performance cycled at a rate of 2C.

Fig. S6 Cycling performance cycled at a rate of 10C.

Fig. S7 SEM image of the CNF@TiO<sub>2</sub> nanocomposite after 50 discharge/charge cycles.

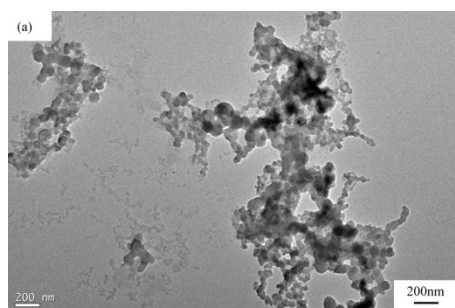

**Fig. S1a**

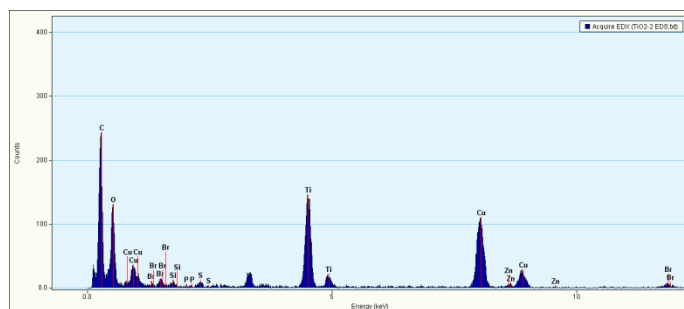

**Fig. S1b**

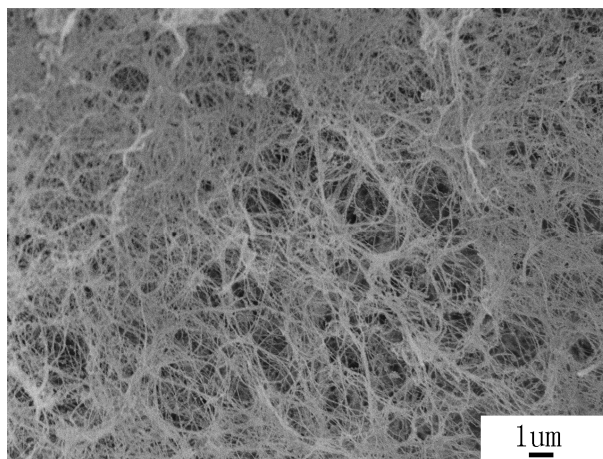

**Fig. S2**

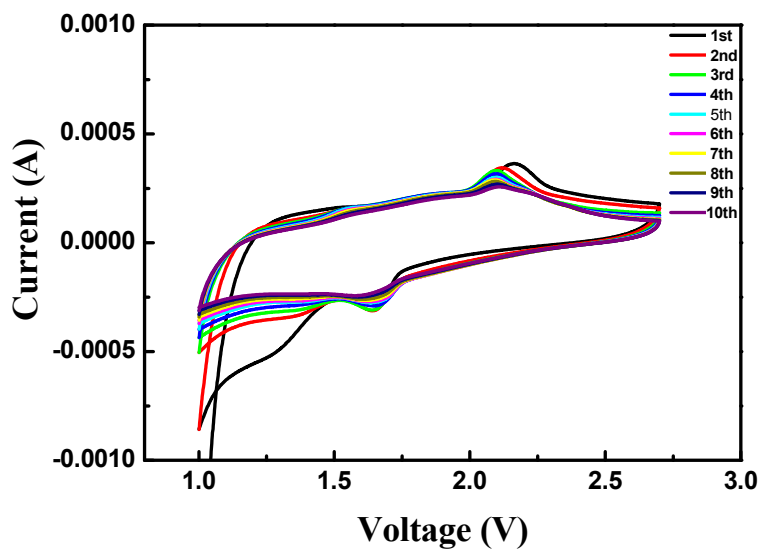

Fig. S3

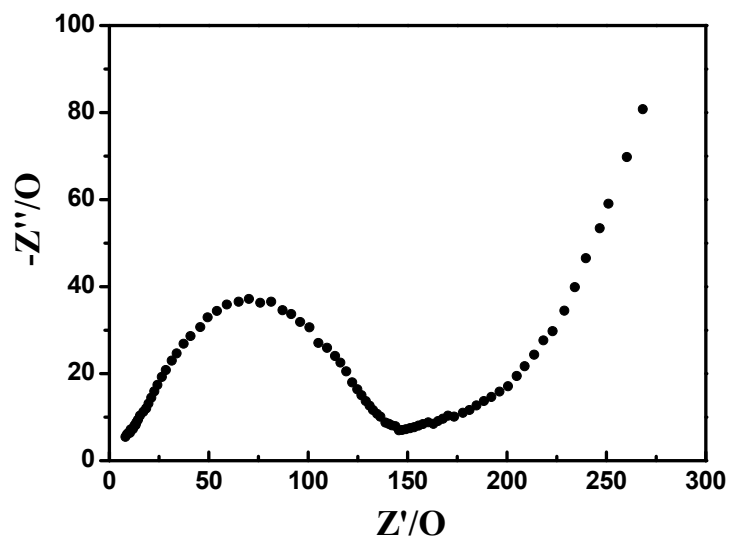

Fig. S4

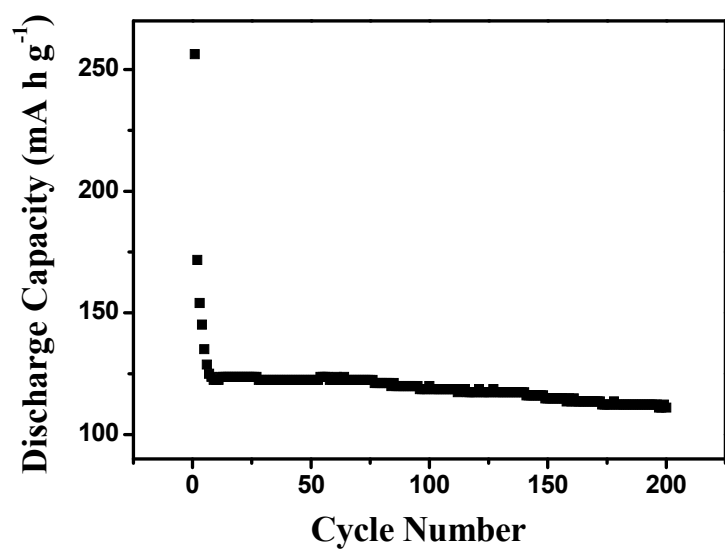

Fig. S5

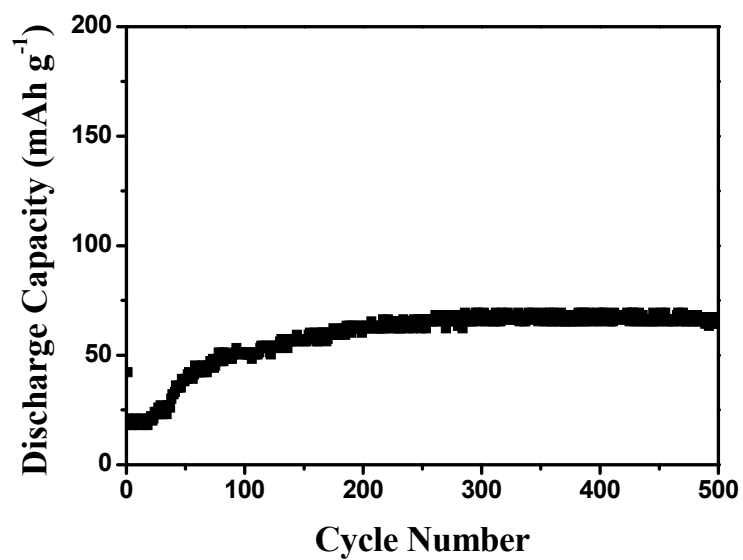

Fig. S6

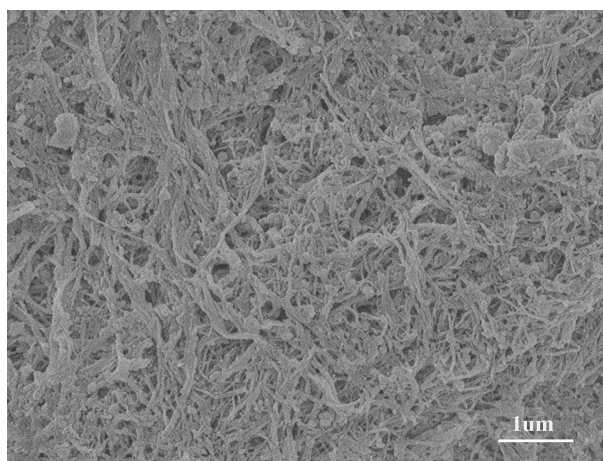

**Fig. S7**
